# Supplementary material
Source: PubMed Central journal article supplement (PMC553316)

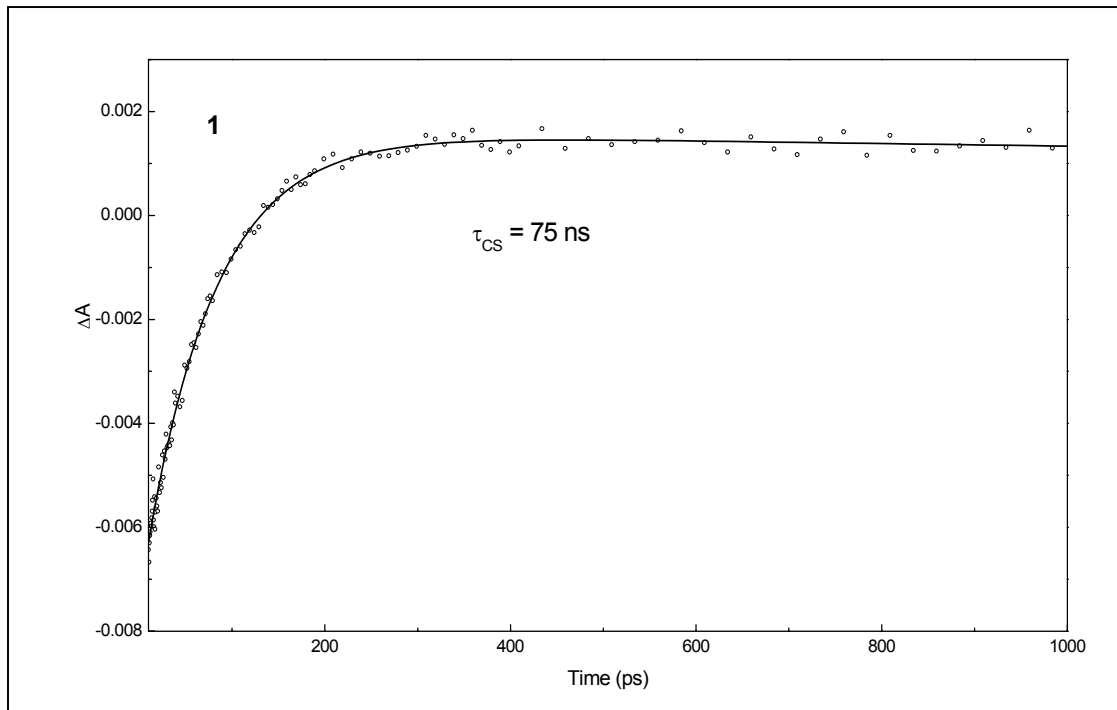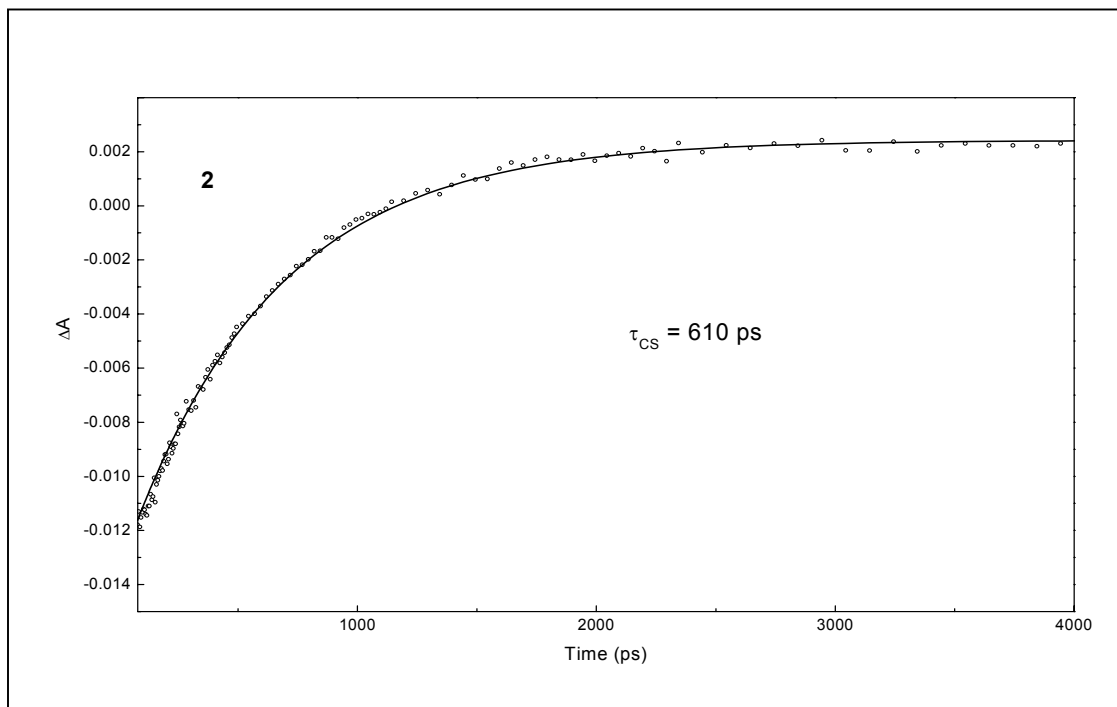

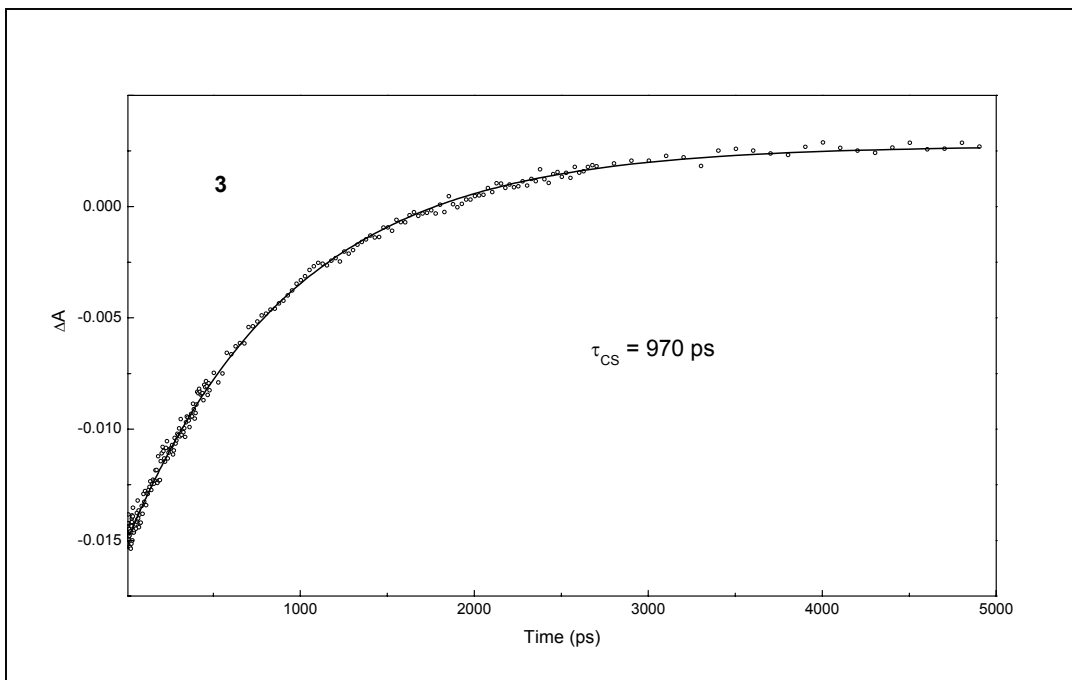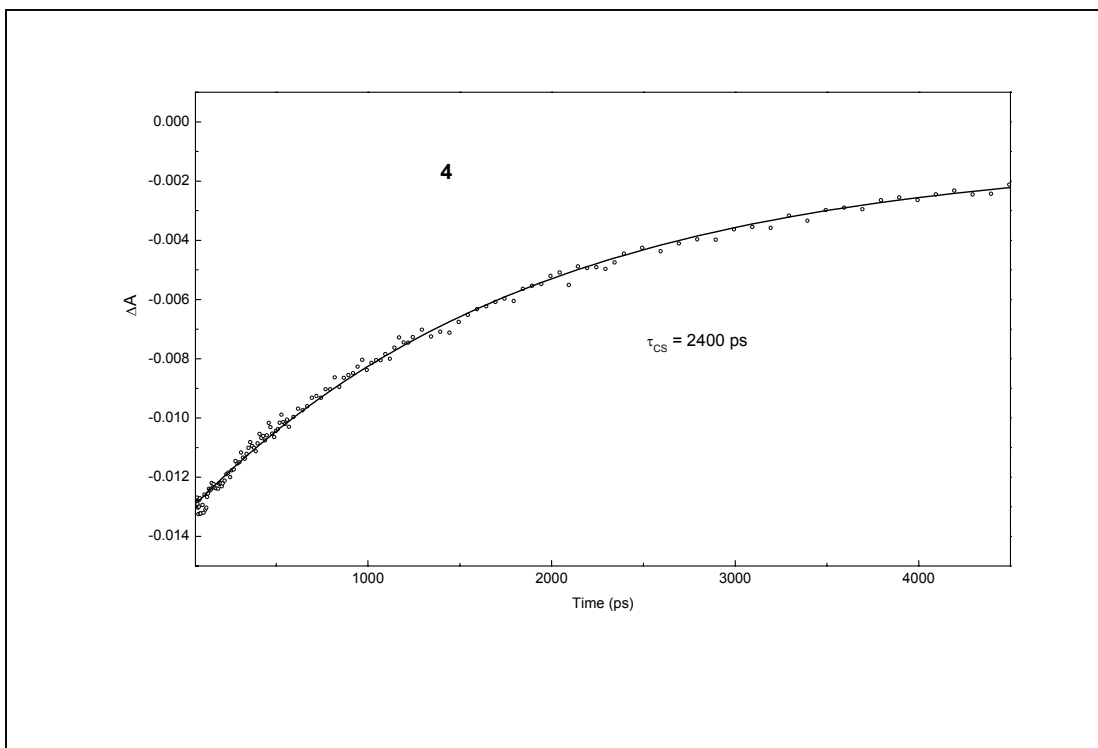

Supplement: pnas_102_10_3540__2.pdf [file pnas_102_10_3540__2.pdf]

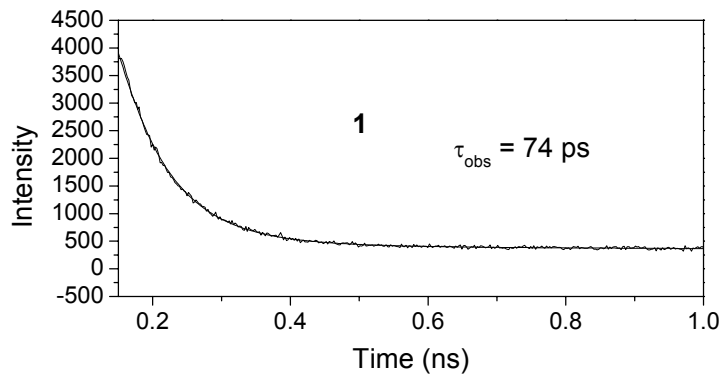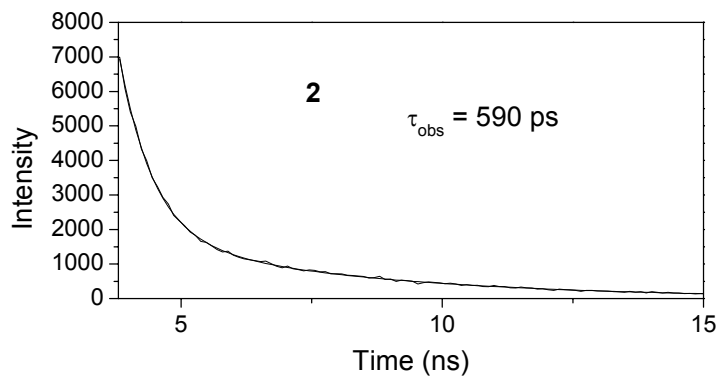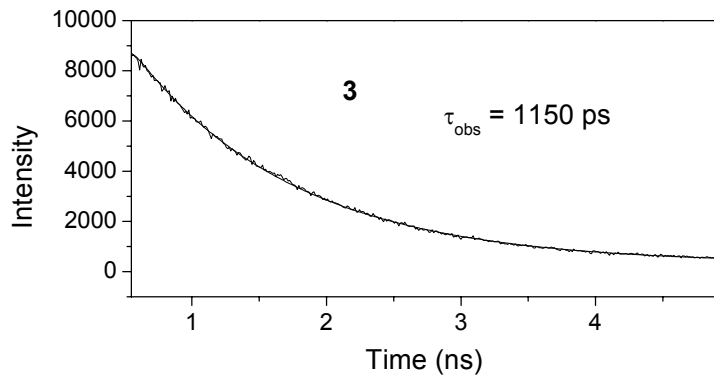

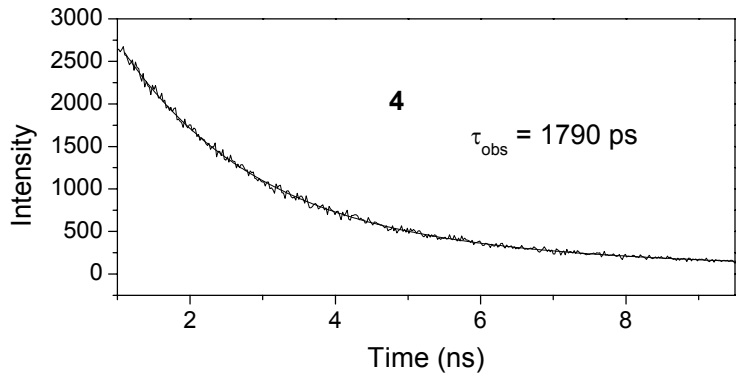

Supplement: pnas_102_10_3540__3.pdf [file pnas_102_10_3540__3.pdf]

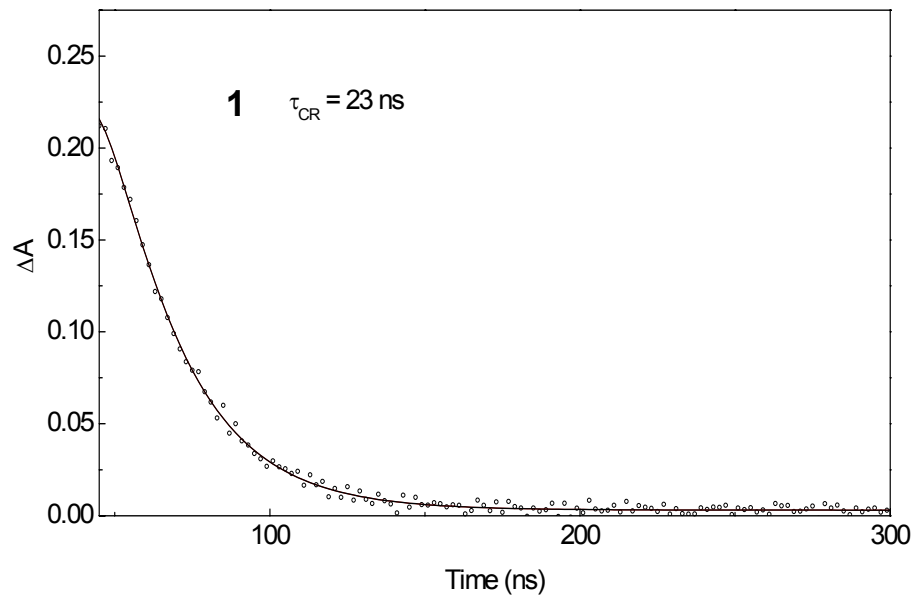

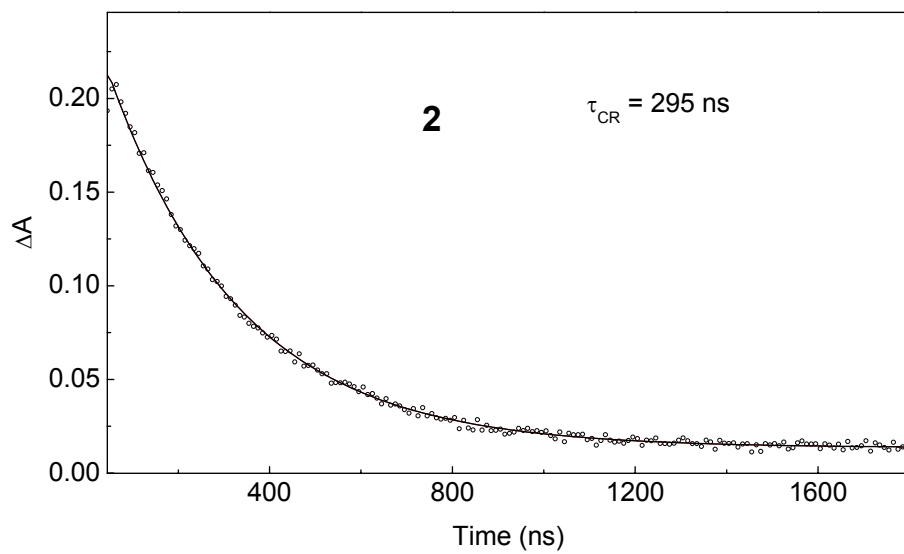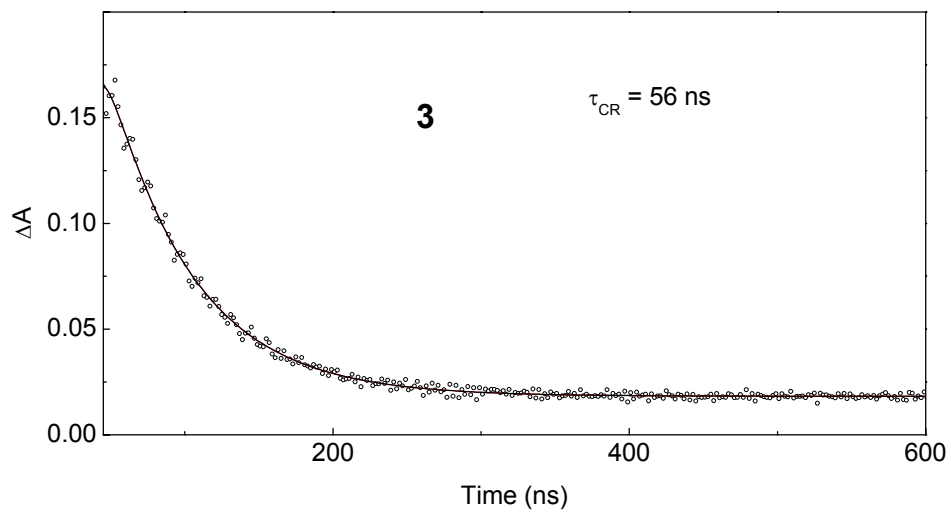

Supplement: pnas_102_10_3540__4.pdf [file pnas_102_10_3540__4.pdf]

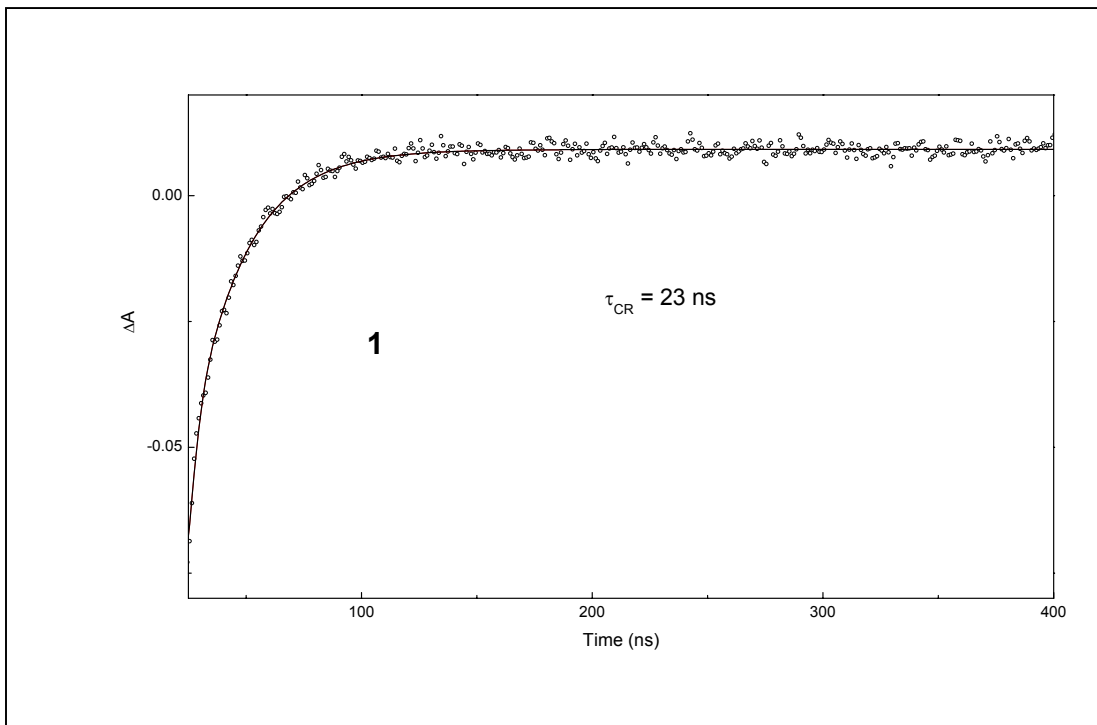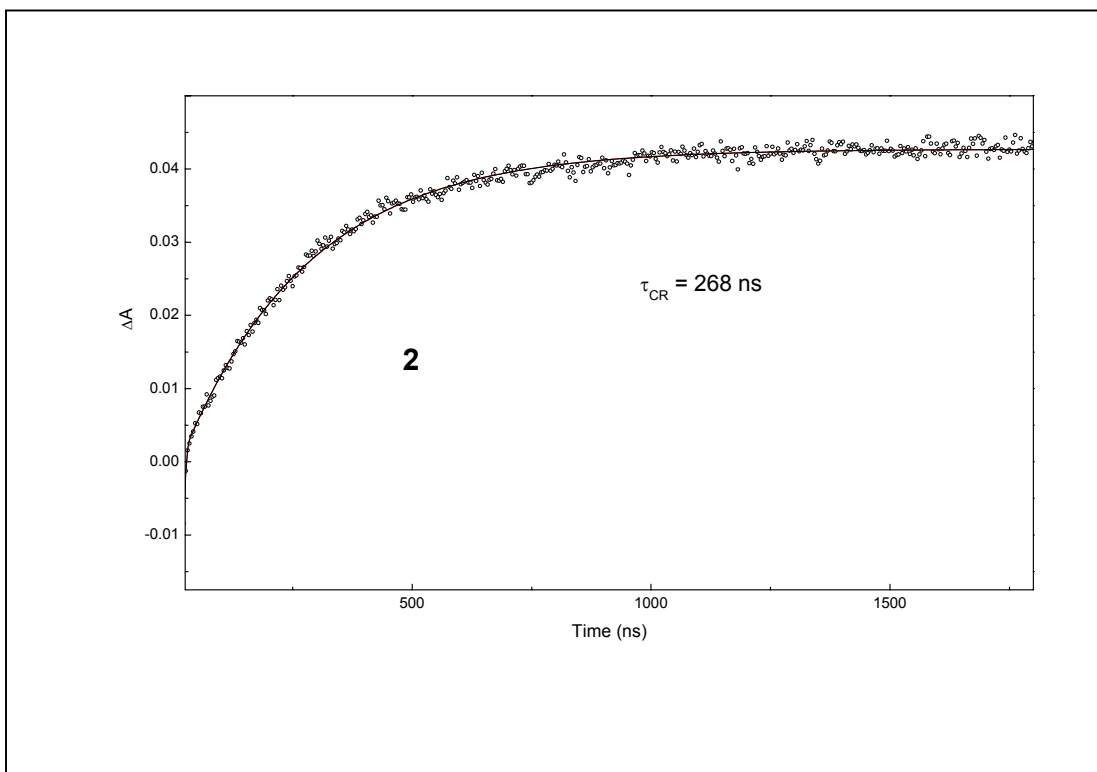

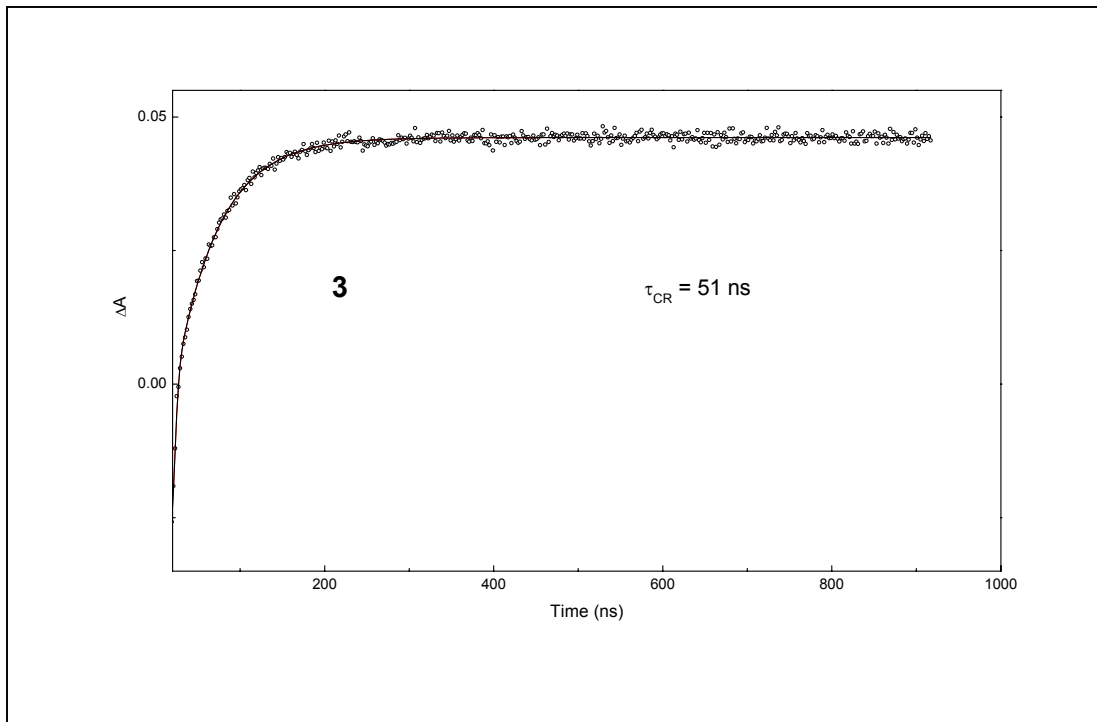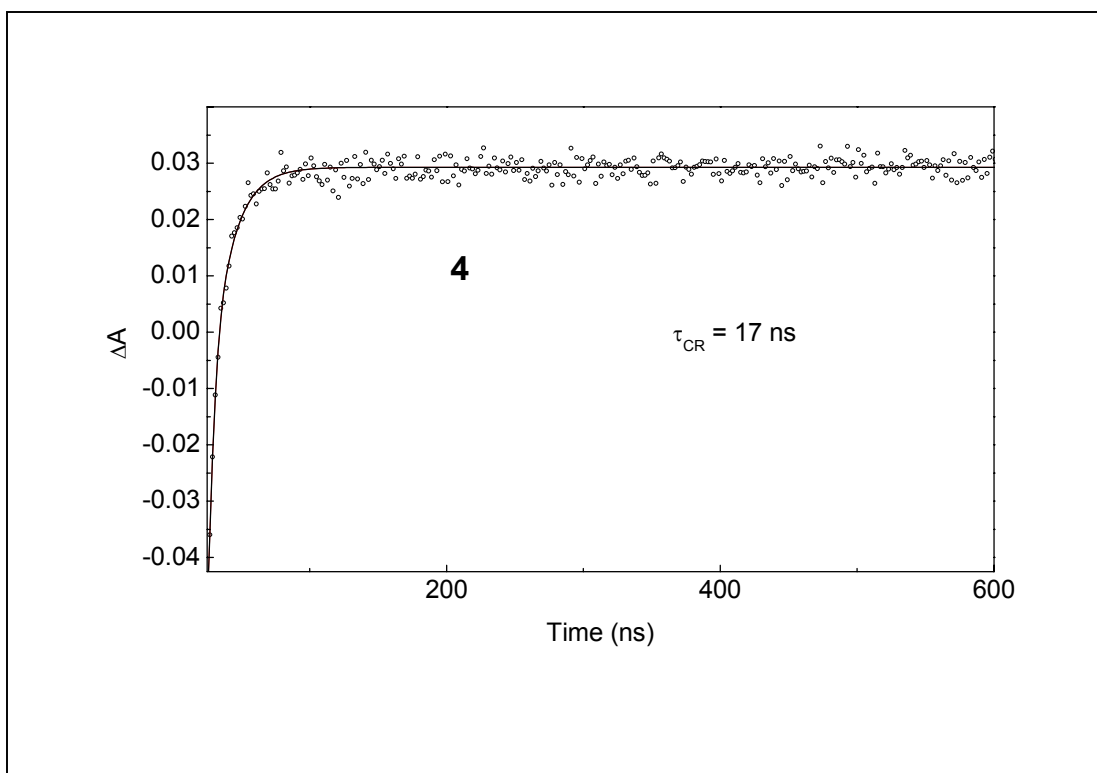

Supplement: pnas_102_10_3540__5.pdf [file pnas_102_10_3540__5.pdf]

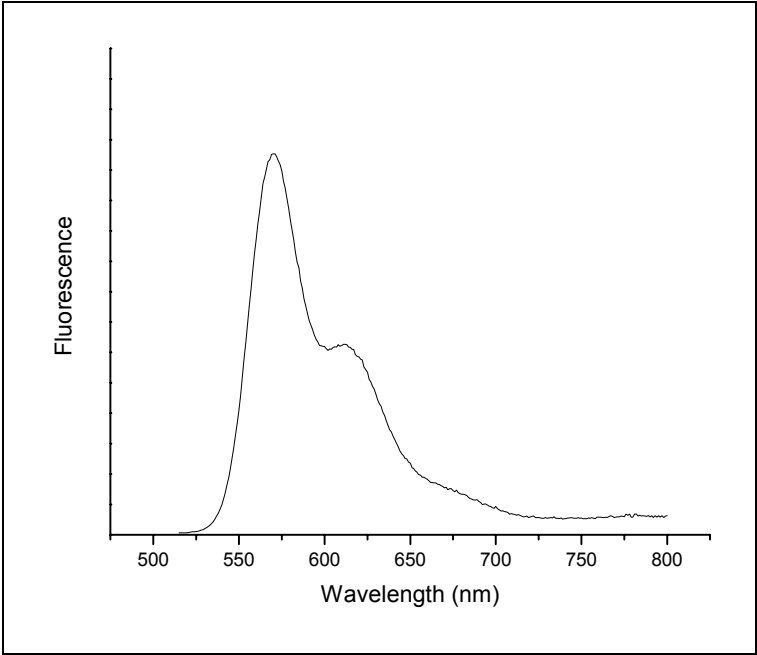

Supplement: pnas_102_10_3540__6.pdf [file pnas_102_10_3540__6.pdf]
